# Supplementary material
Source: Springer Nature journal article supplement (https://www.springermedizin.de/resource/supplementary/12967_2008_310_MOESM4_ESM.pdf/9576178)
Supplement: MOESM4 [file 9576178]

#### Additional file 4 – Physical properties of rhodamine B Gd-PAMAM dendrimers

| Rhodamine B Gd-dendrimer generation | No. terminal amines | Molecular weight <sup>#</sup> (kD) | Gd-DTPA Conjugation % | Rhodamine B Conjugation % | Molar Relaxivity (s/mM) |
|-------------------------------------|---------------------|------------------------------------|-----------------------|---------------------------|-------------------------|
| G2                                  | 16                  | 11.2                               | 42.7                  | 6.6                       | n/a                     |
| G5                                  | 128                 | 75.0                               | 36.5                  | 7.9                       | 9.2                     |
| G8                                  | 1024                | 540 <sup>‡</sup>                   | 31.2                  | 6.6                       | 9.2                     |

<sup>#</sup>obtained from Dendritech, Inc.

<sup>‡</sup>measured by ADF STEM
